# Supplementary material
Source: PubMed Central journal article supplement (PMC7167471)
Supplement: JB.00705-19-s0001.pdf [file JB.00705-19-s0001.pdf]

1 Supplementary information

2  
3 Metabolic switching of *Mycobacterium tuberculosis* during hypoxia is controlled by  
4 the virulence regulator PhoP

5  
6 Prabhath Ranjan Singh<sup>1</sup>, Vijjamarri Anil Kumar<sup>1, 2</sup>, and Dibyendu Sarkar<sup>1,\*</sup>  
7  
8

9  
10 <sup>1</sup>CSIR-Institute of Microbial Technology, Sector 39 A, Chandigarh 160036, India

11  
12  
13 Running title: Metabolic switching in mycobacteria

14  
15  
16  
17 <sup>2</sup>Present Address: National Institute of Child Health and Human Development, Building 6,  
18 National Institutes of Health, Bethesda, MD 20892  
19

20 \*Address correspondence to: Dibyendu Sarkar, CSIR-Institute of Microbial Technology,  
21 Tel.: 091-172-6665291; Fax: 091-172-2690585; E-mail: [dibyendu@imtech.res.in](mailto:dibyendu@imtech.res.in)  
22  
23

24 Key Words: Hypoxia regulator; metabolic switching; *M. tuberculosis* PhoP;  
25 Protein - protein interactions; virulence regulator  
26

27 **Table S1**

28

29 Oligonucleotide primers used in RT-qPCR and ChIP experiments of this study

30

| Primers <sup>a</sup> | Sequence or description (5'-3') | Reference  |
|----------------------|---------------------------------|------------|
| FPnarK1RT            | ATCGTGTGCTAATTCCGGC             | This study |
| RPnarK1RT            | TTGCCAACAACCCAACTAGC            | This study |
| FPnirBRT             | GTCAGCGGATCGACTTGTTTC           | This study |
| RPnirBRT             | GCTTTATTTTGTGCGGTGCC            | This study |
| FPnarGRT             | TCGAGCATCTTAAGCCGTTT            | This study |
| RPnarGRT             | TCGAGTGAAACGACCACTTG            | This study |
| FPglnRRT             | GAGCTGCTGAAATACCTGGC            | This study |
| RPglnRRT             | AGCTTTGTATCCGACGTTGC            | This study |
| FPdosRRT             | CTATCAGGCCTTACCGACCA            | This study |
| RPdosRRT             | AACCGCGACACGTAGTTCTT            | This study |
| FPnarK2RT            | GTGACCTGGGAGATGTCGTT            | This study |
| RPnarK2RT            | AGAACCCGTAGATCGTGGTG            | This study |
| FPhspXRT             | CGACAAGGACGTCGACATTA            | This study |
| RPhspXRT             | CCTTGTCGTAGGTGGCCTTA            | This study |
| FPnarK1              | GTACTIONGAGCACAATAGCTTTC        | This study |
| RPnarK1              | CGAAGGGGCCGCGGGACTGC            | This study |
| FPnirB               | TGGTTATCTCCTCATGCTTCGT          | This study |
| RPnirB               | GCCGACCACGACGATCTCGCGAGCCG      | This study |
| FPnarG               | ACGGTGTGGTTGACGGTGGCC           | This study |
| RPnarG               | GCGCCCGCTGCGCTCCAGCAG           | This study |
| FPglnR               | CGAAGGGGCCGCGGGACTGC            | This study |
| RPglnR               | GGCAGGACCGGATCCGGATA            | This study |
| FPdosR               | AATAATGGATCCGTCACCAACCAT        | This study |
| RPdosR               | AATAATGGTACCTGGGCGGGCAG         | This study |
| FPnarK2              | CCCTTTCCAGTGGCGACCAGGCT         | This study |
| RPnarK2              | CCAGAAGTTGACCACCGAGATCC         | This study |
| FPhspX               | TGATCAACCTCCGCTGTTCGAT          | This study |
| RPhspX               | CTCAGAAAACCTCGGGGAAGA           | This study |
| FP16SrDNA            | CTGAGATACGGCCAGAGCTC            | This study |
| RP16SrDNA            | CGTCGATGGTCAAAGAGGTT            | This study |
| FPpks2               | GTTGTGGAAGGCGTTGTTAC            | This study |
| RPpks2               | GTCGTAGAACTCGTCGCAAT            | This study |

31

32 <sup>a</sup>FP, forward primer; RP, reverse primer

33

34

35

36

37 **Table S2**

38

39 Oligonucleotide primers used for cloning and amplifications in this study

| Primers                  |                                                        |            |
|--------------------------|--------------------------------------------------------|------------|
| <sup>a</sup> FPdosRstart | AATAATCATATGATGGGAAGCGCCGA                             | This study |
| RPdosRstop               | AATAATGGATCCTCATCGAGCACCCA                             | This study |
| FPhrcAstart              | AATAATCATATGATGGGAAGCGCCGA                             | This study |
| RPhrcAstop               | AATAATGGATCCTCATCGAGCACCCA                             | This study |
| RPdosR-N                 | AATAATGGATCCATGGGAAGCGCC                               | This study |
| FPdosR-C                 | AATAATTCACTTGTCGTCATCGTCTTTGTAGT<br>CTCGAGCACCCAG      | This study |
| FPphoPD71N               | GTGATCCTCAACGTGATGATGCC                                | (1)        |
| RPphoPD71N               | CATCATCACGTTGAGGATCACCGC                               | (1)        |
| FPdosR54E                | GTCGCGGTGCTGGAGGTCCGGTT                                | This study |
| RPdosR54E                | AACCGGACCTCCAGCACCGCGAC                                | This study |
| FPkidosR                 | AATAATCATATGATGGCGAAGAAC                               | This study |
| RPkidosR                 | AATAATGGATCCCCGGCGCGGTT                                | This study |
| FPphoPstart              | AATAATGGATCCATGCGGAAAGGGGT                             | This study |
| RPphoPFLAG               | AATAAGCTTTCACTTGTCGTCATCGTCTTTGT<br>AGTCTCGAGGCTCCCGCA | This study |
| <sup>b</sup> FPdosRLHS   | CACCTTTTCCATAAATGGGATATCCCGCAG<br>GTCTGACCGCCGCG       | This study |
| RPdosRLHS                | TTTTTTTTCCATTTCTTGCTCAAAGCGACGC<br>TCGTCTC             | This study |
| FPdosRRHS                | CACCTTTTCCATAGATTGGTATATCGGCGACG<br>TCCTGGG            | This study |
| RPdosRRHS                | TTTTTTTTCCATCTTTTGGGATATCATCACCG<br>AACCTGGCTGCGA      | This study |
| FPmdosR                  | AATAATGGATCCATGGGAAGCGCC                               | This study |
| RPmdosR                  | AATAATCTGCAGTCATCGAGCACC                               | This study |
| FPmglnR                  | AATGGATCCATGCCTACGGGCCCCACG                            | This study |
| RPmglnR                  | AATAAGCTTTCACTTGCAACGGTTTAG                            | This study |
| FPdosRup                 | TGCCGCCCTTGACCCGT                                      | This study |
| RPdosRup                 | GGTAAGAACGCGTAGTCCA                                    | This study |
| FPdosRupmut              | CGTACTACGATTTTCATTACGCTGGTTCGGC                        | This study |
| RPdosRupmut              | TAATGAAATCGTAGTACGATCGCTTGACCC                         | This study |

40

41 <sup>a</sup>FP, forward primer; RP, reverse primer; <sup>b</sup>LHS, left hand sequence; RHS, right hand sequence

42

43

44 **Table S3**

45

46 Plasmids used in this study

47

| Plasmids                 | Relevant genotype or sequence (5'-3')                                      | Source or Reference |
|--------------------------|----------------------------------------------------------------------------|---------------------|
| pET28b                   | <i>E. coli</i> cloning vector, Amp <sup>r</sup> <sup>a</sup>               | Novagen             |
| pET- <i>dosR</i>         | DosR residues 1–217 cloned in pET28b                                       | This study          |
| pET- <i>dosR-N</i>       | DosR residues 1–193 cloned in pET28b                                       | This study          |
| pET- <i>dosR-C</i>       | DosR residues 143–217 cloned in pET28b                                     | This study          |
| pET- <i>phoP-N</i>       | PhoP residues 1–141 cloned in pET15b                                       | (2)                 |
| pET- <i>phoP-C1</i>      | PhoP residues 141–247 cloned in pET15b                                     | (2)                 |
| pET- <i>phoP-C2</i>      | PhoP residues 150–247 cloned in pET15b                                     | (2)                 |
| pGEX-4T-1                | <i>E. coli</i> cloning vector, Amp <sup>r</sup> <sup>a</sup>               | GE-Healthcare       |
| pGEX- <i>dosR</i>        | DosR residues 1–217 cloned in pGEX-4T-1                                    | This study          |
| p19Kpro                  | Mycobacterial expression vector, Hyg <sup>r</sup> <sup>b</sup>             | (3)                 |
| p19Kpro- <i>phoP</i>     | PhoP residues 1–247 cloned in p19kpro                                      | (4)                 |
| p19Kpro- <i>dosR</i>     | DosR residues 1–217 cloned in p19kpro                                      | This study          |
| pST-Ki                   | Integrative mycobacterial expression vector, Kan <sup>r</sup> <sup>c</sup> | (5)                 |
| pST-Ki- <i>dosR</i>      | DosR residues 1–217 cloned in pST-Ki                                       | This study          |
| pSM128                   | Integrative promoter probe vector for mycobacteria <sup>d</sup>            | (6)                 |
| pSM- <i>dosRup</i>       | <i>dosRup3-lacZ</i> fusion in pSM128                                       | This work           |
| pSM- <i>dosRupmut</i>    | PhoP binding site mutated in pSM- <i>dosRup</i>                            | This work           |
| pME1mL1                  | Mycobacterial protein expression vector <sup>b</sup>                       | (7)                 |
| pME1mL1- <i>phoP</i>     | PhoP residues 1–247 cloned in pME1mL1                                      | (8)                 |
| pUAB300 <sup>b</sup>     | Episomal mycobacteria- <i>E. coli</i> shuttle plasmid                      | (9)                 |
| pUAB300- <i>dosR</i>     | DosR residues 1–217 cloned in pUAB300                                      | This study          |
| pUAB300- <i>dosR-N</i>   | DosR residues 1–193 cloned in pUAB300                                      | This study          |
| pUAB300- <i>dosR-C</i>   | DosR residues 143–217 cloned in pUAB300                                    | This study          |
| pUAB300- <i>dosRD54E</i> | Asp54 mutated to Glu in <i>dosR</i> of pUAB300- <i>dosR</i>                | This study          |
| pUAB400 <sup>c</sup>     | Integrative mycobacteria- <i>E. coli</i> shuttle plasmid                   | (9)                 |
| pUAB400- <i>phoP</i>     | PhoP residues 1–247 cloned in pUAB400                                      | (10)                |
| pUAB400- <i>phoP-N</i>   | PhoP residues 1–141 cloned in pUAB400                                      | This study          |
| pUAB400- <i>phoP-C</i>   | PhoP residues 141–247 cloned in pUAB400                                    | This study          |
| pUAB400- <i>phoPD71N</i> | Asp71 mutated to Asn in <i>phoP</i> of pUAB400- <i>phoP</i>                | This study          |
| pUAB300- <i>glnR</i>     | GlnR residues 1–252 cloned in pUAB300                                      | This study          |

48

49 <sup>a</sup> ampicillin resistance; <sup>b</sup> hygromycin resistance; <sup>c</sup> kanamycin resistance; <sup>d</sup> streptomycin resistance

50

51

52

53 **Figure S1**  
 54  
 55

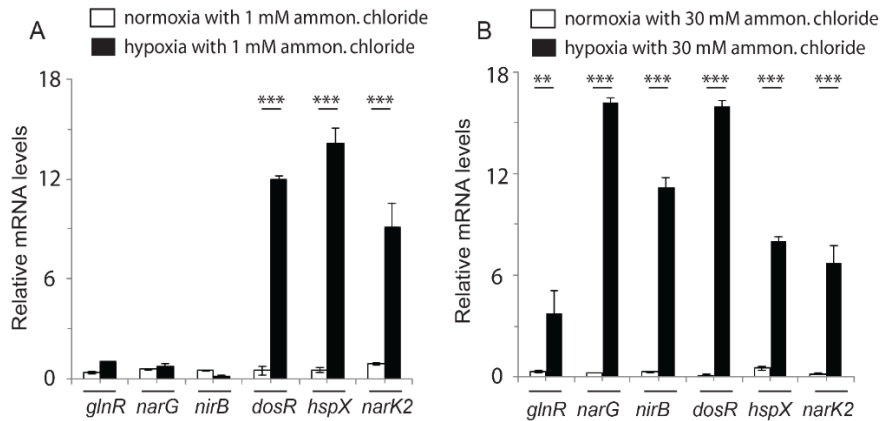

56  
 57  
 58 **Fig. S1: Regulation of hypoxia-inducible mycobacterial genes.** (A-B) RT-qPCR was carried out to  
 59 compare expression levels of indicated hypoxia-inducible genes in the WT bacilli under specific conditions of  
 60 growth (normoxic or hypoxic) coupled with either limiting nitrogen (1 mM ammonium chloride) or surplus  
 61 nitrogen (30 mM ammonium chloride) conditions. The difference of mRNA levels with standard deviations  
 62 were determined from at least three independent RNA preparations (\*\* $P < 0.01$ ; \*\*\* $P < 0.001$ ).

63  
 64 **Figure S2**  
 65

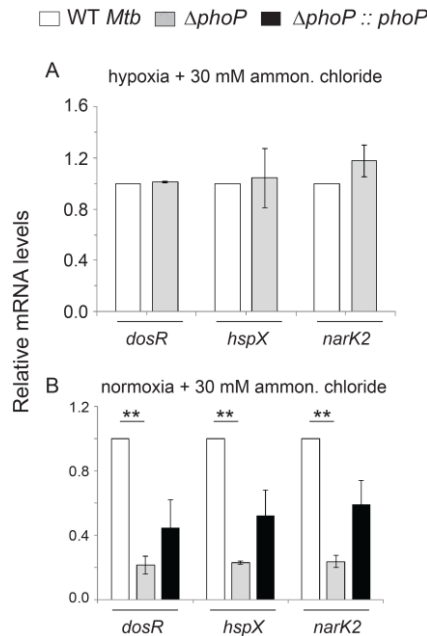

66  
 67  
 68  
 69 **Fig. S2: Regulation of hypoxia-inducible Mtb genes by the *phoP* locus under indicated growth**  
 70 **conditions.** (A-B) RT-qPCR was carried out to compare relative expression of hypoxia-inducible  
 71 genes in the WT,  $\Delta phoP$  and the complemented mutant under hypoxia and normoxia, respectively,  
 72 coupled with surplus (30 mM) ammonium chloride. The results show average mRNA levels of  
 73 hypoxia-inducible genes with standard deviations derived from replicate experiments using at least 3  
 74 independent RNA preparations.

75 **Figure S3:**  
 76  
 77  
 78

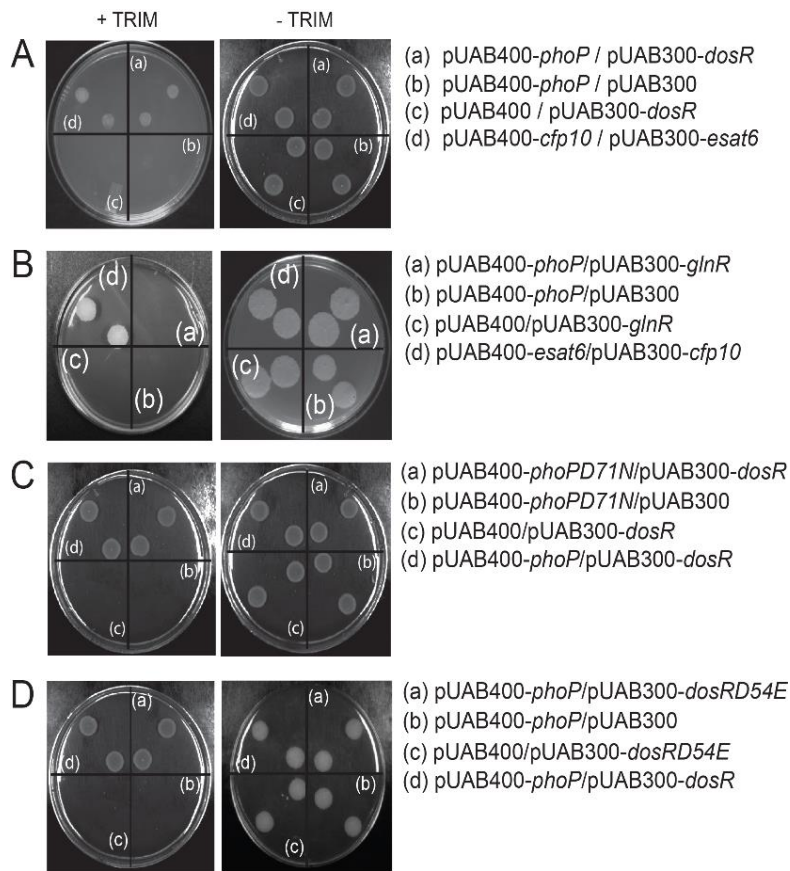

79  
 80  
 81

82

83 **Fig. S3:** M-PFC experiments examined (A) PhoP-DosR, and (B) PhoP-GlnR interactions in *M.*  
 84 *smegmatis* as described in the Methods. Growth of transformants on 7H11/Kan/Hyg in presence of  
 85 TRIM suggests *in vivo* protein-protein association between the regulator pairs. Co-expression of  
 86 empty vectors and *esat6/cfp10* pair, were included as negative and positive control, respectively. (C-  
 87 D) To examine the effect of phosphorylation of regulators on PhoP-DosR interactions, M-PFC  
 88 experiments were carried out using phosphorylation defective mutants of PhoP and DosR,  
 89 respectively. Results of the M-PFC experiments using regulator pairs (C) PhoPD71N-DosR and (D)  
 90 PhoP-DosRD54E suggest that phosphorylation do not appear to have a role on PhoP-DosR protein-  
 91 protein interactions.

92

93

94 **Figure S4**

95  
96  
97

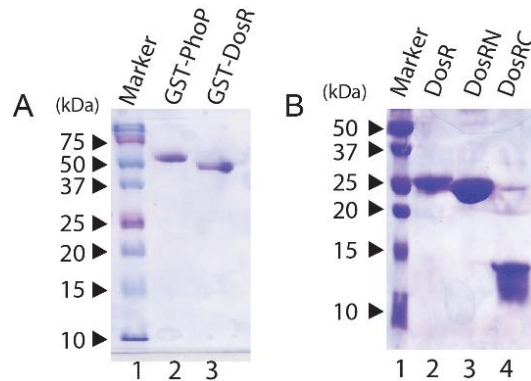

98  
99

100 **Fig. S4:** Recombinant proteins, expressed and purified as described in the Methods, were analysed by  
101 12% SDS-PAGE, and visualized by Coomassie blue staining. While panel A resolves GST-tagged  
102 PhoP (lane 2) and DosR (lane 3) ( $\approx 3 \mu\text{g}$  each), panel B analysed His<sub>6</sub>-tagged DosR (lane 2), N-  
103 domain of DosR (DosRN; lane 3) and C-domain of DosR (DosRC; lane 4), respectively ( $\approx 5 \mu\text{g}$  each).  
104 Domain constructs of DosR are described in the ‘Results’ section. As a reference, molecular mass  
105 markers are resolved in lane 1 of both panels, and sizes of proteins in kDa are indicated to the left.

106

107 **Figure S5**

108  
109

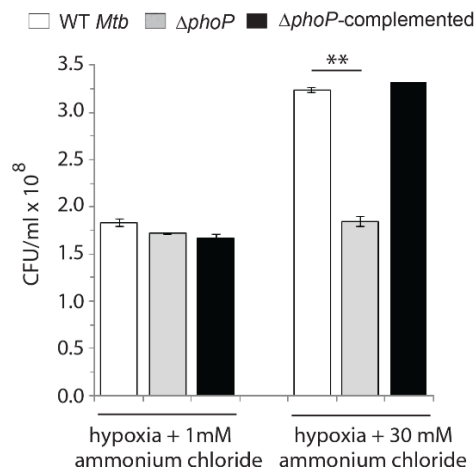

110

111

112 **Fig. S5:** CFU/ml data of the WT and the mutant strains grown for 12 days under indicated hypoxic  
113 conditions.  $\Delta\text{phoP}$  shows limited growth as that of the WT bacilli under hypoxia coupled with  
114 limiting nitrogen conditions. However, under hypoxia coupled with nitrogen surplus conditions, WT  
115 bacilli is capable to overcome the growth defect. In contrast,  $\Delta\text{phoP}$  mutant is unable to restore  
116 growth as that of the WT bacteria. Importantly, growth defect of the mutant under identical conditions  
117 is fully restored in the complemented mutant.

118

119 **References**

120

- 121 1. Gupta S, Pathak A, Sinha A, Sarkar D. 2009. Mycobacterium tuberculosis PhoP recognizes  
122 two adjacent direct-repeat sequences to form head-to-head dimers. *Journal of bacteriology*  
123 191:7466-76.
- 124 2. Pathak A, Goyal R, Sinha A, Sarkar D. 2010. Domain structure of virulence-associated  
125 response regulator PhoP of Mycobacterium tuberculosis: role of the linker region in regulator-  
126 promoter interaction(s). *The Journal of biological chemistry* 285:34309-18.
- 127 3. De Smet KA, Kempell KE, Gallagher A, Duncan K, Young DB. 1999. Alteration of a single  
128 amino acid residue reverses fosfomycin resistance of recombinant MurA from  
129 Mycobacterium tuberculosis. *Microbiology* 145 ( Pt 11):3177-84.
- 130 4. Anil Kumar V, Goyal R, Bansal R, Singh N, Sevalkar RR, Kumar A, Sarkar D. 2016. EspR-  
131 dependent ESAT-6 Protein Secretion of Mycobacterium tuberculosis Requires the Presence  
132 of Virulence Regulator PhoP. *The Journal of biological chemistry* 291:19018-30.
- 133 5. Parikh A, Kumar D, Chawla Y, Kurthkoti K, Khan S, Varshney U, Nandicoori VK. 2013.  
134 Development of a new generation of vectors for gene expression, gene replacement, and  
135 protein-protein interaction studies in mycobacteria. *Applied and environmental microbiology*  
136 79:1718-29.
- 137 6. Dussurget O, Timm J, Gomez M, Gold B, Yu S, Sabol SZ, Holmes RK, Jacobs WR, Jr.,  
138 Smith I. 1999. Transcriptional control of the iron-responsive fxB gene by the mycobacterial  
139 regulator IdeR. *J Bacteriol* 181:3402-8.
- 140 7. Ehrt S, Guo XV, Hickey CM, Ryou M, Monteleone M, Riley LW, Schnappinger D. 2005.  
141 Controlling gene expression in mycobacteria with anhydrotetracycline and Tet repressor.  
142 *Nucleic acids research* 33:e21.
- 143 8. Goyal R, Das AK, Singh R, Singh PK, Korpole S, Sarkar D. 2011. Phosphorylation of PhoP  
144 protein plays direct regulatory role in lipid biosynthesis of Mycobacterium tuberculosis. *The*  
145 *Journal of biological chemistry* 286:45197-208.
- 146 9. Singh A, Mai D, Kumar A, Steyn AJ. 2006. Dissecting virulence pathways of Mycobacterium  
147 tuberculosis through protein-protein association. *Proceedings of the National Academy of*  
148 *Sciences of the United States of America* 103:11346-51.
- 149 10. Singh R, Anil Kumar V, Das AK, Bansal R, Sarkar D. 2014. A transcriptional co-repressor  
150 regulatory circuit controlling the heat-shock response of Mycobacterium tuberculosis.  
151 *Molecular microbiology* 94:450-65.

152

153
